# Supplementary material for: Highly stretchable GR/TPU strain sensor based on one-step electrospun fibrous yarns for wearable devices
Source: Royal Society of Chemistry journal article supplement (doi:10.1039/d4ta00176a), 2024-01-01
Supplement: d4ta00176a2.pdf [file d4ta00176a2.pdf]

## Supporting Information

### **Highly stretchable GR/TPU strain sensor based on one-step electrospun fibrous yarns for wearable devices**

Lei Xing,<sup>a</sup> Linze Li,<sup>a</sup> Yu Liu,<sup>a</sup> Junyi Ren,<sup>b</sup> Guilei Guo,<sup>a</sup> Yifan Chen,<sup>a</sup> Yu Zheng\*<sup>a</sup> and Bin Sun\*<sup>a,b,c</sup>

<sup>a</sup> College of Electronics and Information, Qingdao University, Qingdao 266071, PR. China.

<sup>b</sup> College of Physics, Qingdao University, Qingdao 266071, PR China.

<sup>c</sup> Weihai Innovation Research Institute of Qingdao University, Weihai 264200, PR. China.

E-mail: [zhengyu@qdu.edu.cn](mailto:zhengyu@qdu.edu.cn) (Y. Zheng); [qdusun@qdu.edu.cn](mailto:qdusun@qdu.edu.cn) (B. Sun)

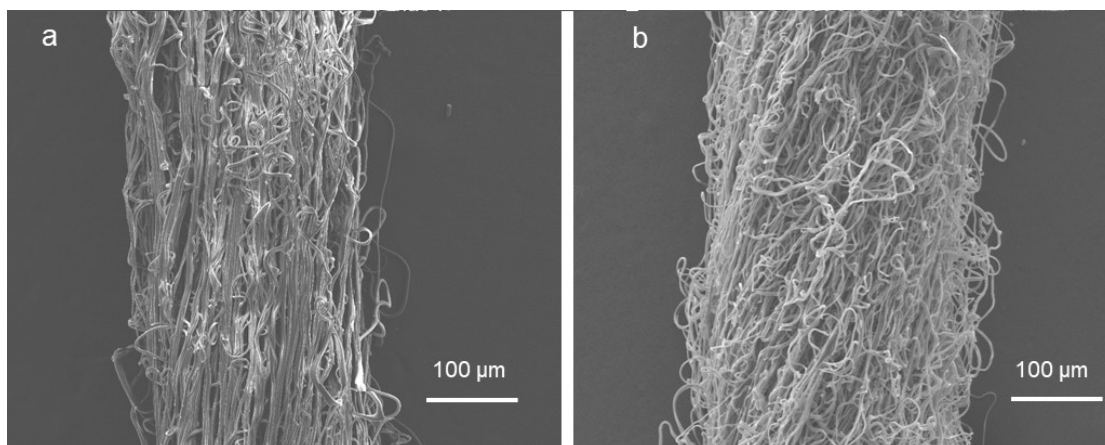

Fig. S1 Morphologies of the samples with (a) 100 r/min, and (b) 120 r/min, respectively.

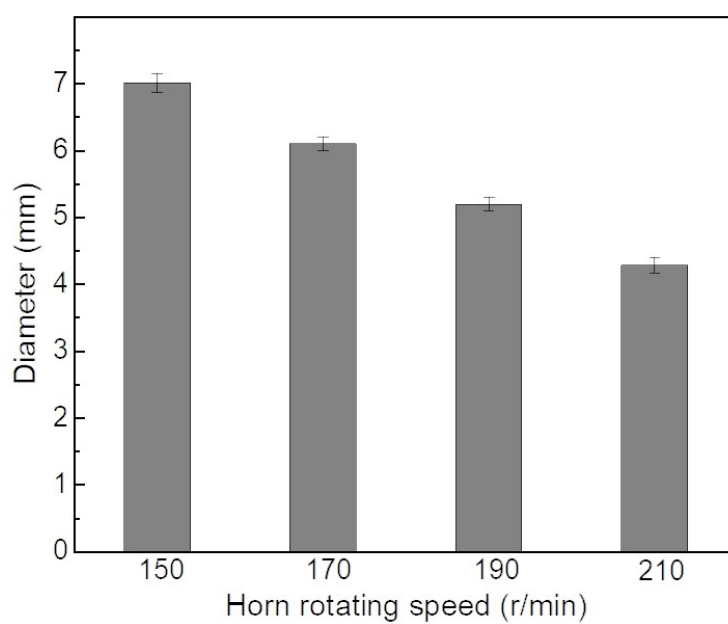

Fig. S2 Relationship between horn rotation speed and fiber yarn diameter size.

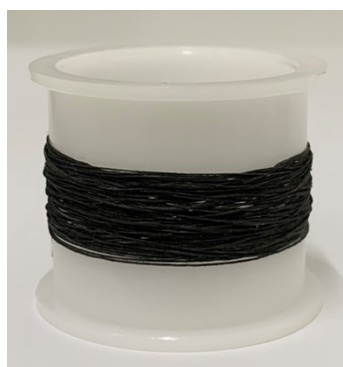

Fig. S3 GR/TPU yarns after ultrasonic treatment.

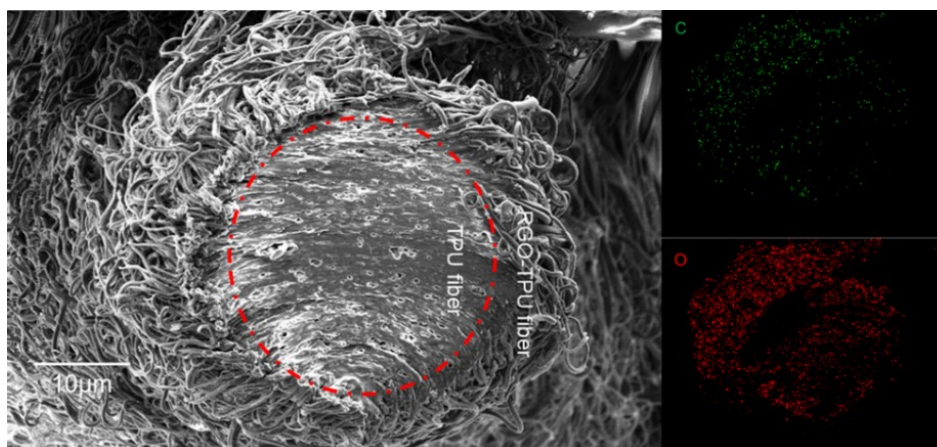

Fig. S4 Cross sectional SEM image of and the energy dispersive spectroscopy (EDS) mapping of 150@GR/TPU fibrous yarn.

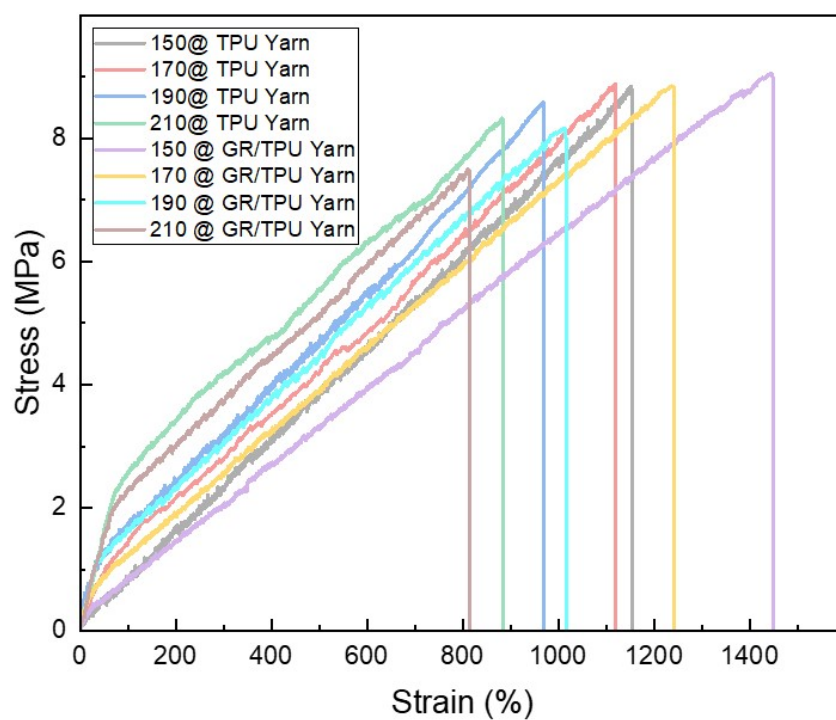

Fig. S5 Typical stress-strain curves of the fibrous yarns.

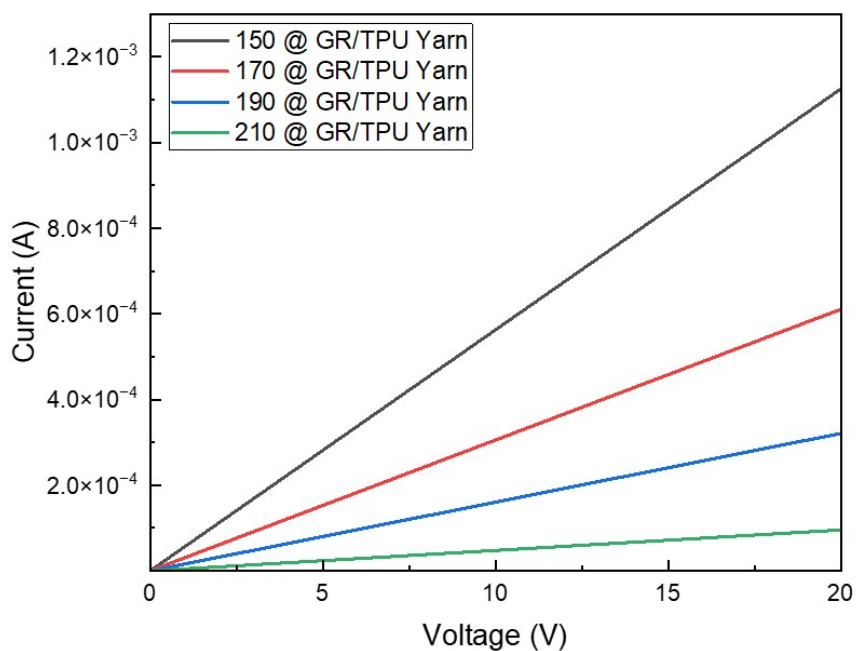

Fig. S6 I-V curves of GR/TPU yarns at different horn rotating speed.

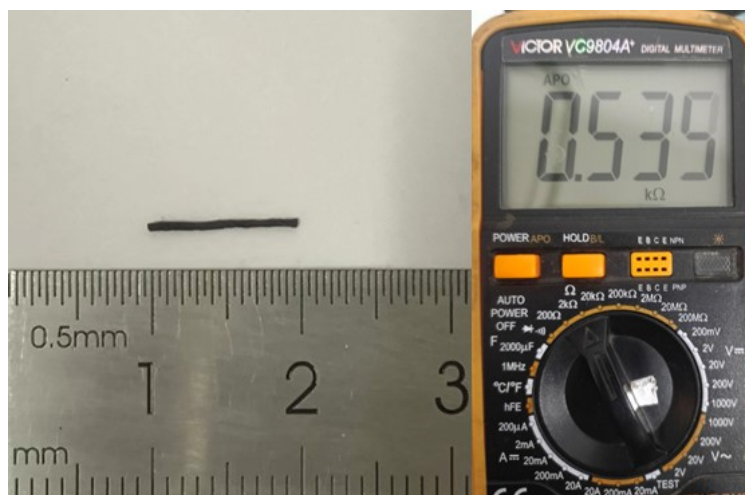

Fig. S7 Resistance value of 150@GR/TPU fibrous yarn with a length of 1cm.

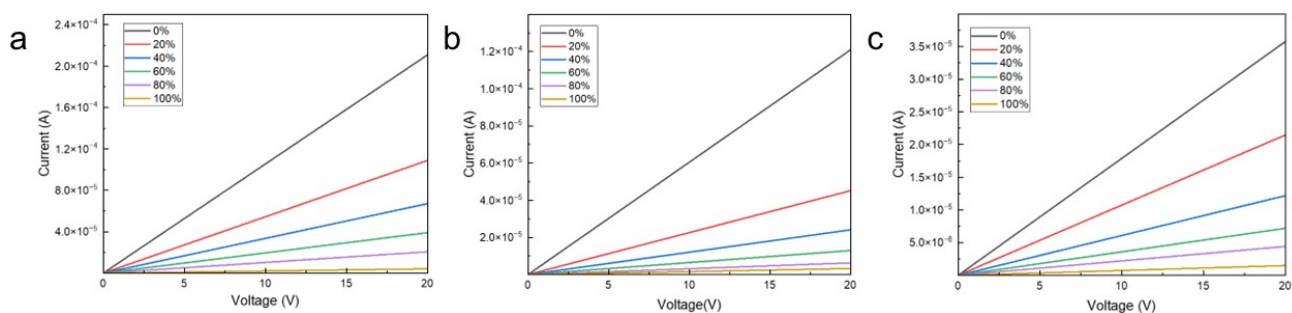

Fig. S8 I-V curves of (a) 170@GR/TPU yarns, (b) 190@GR/TPU yarns and (c) 210@GR/TPU yarns under 0%-100% static strains.

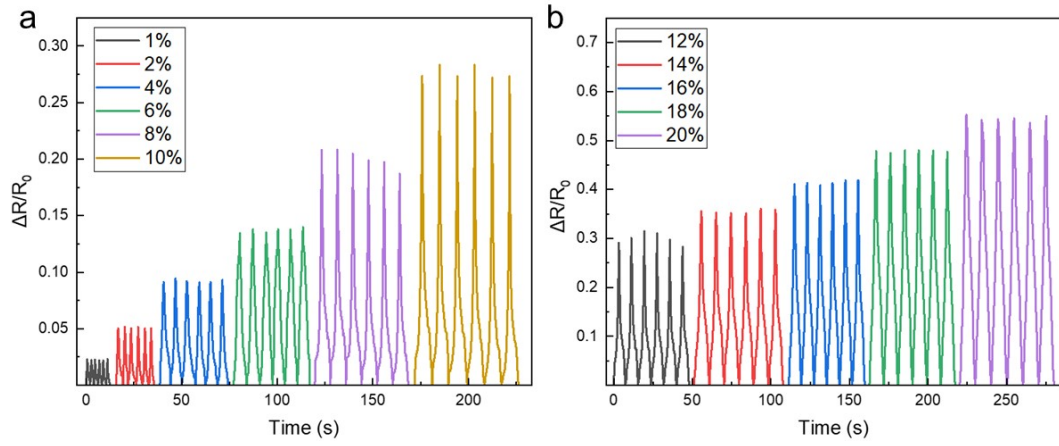

Fig. S9 I-V curves of 150@GR/TPU yarns under different dynamic low strains.

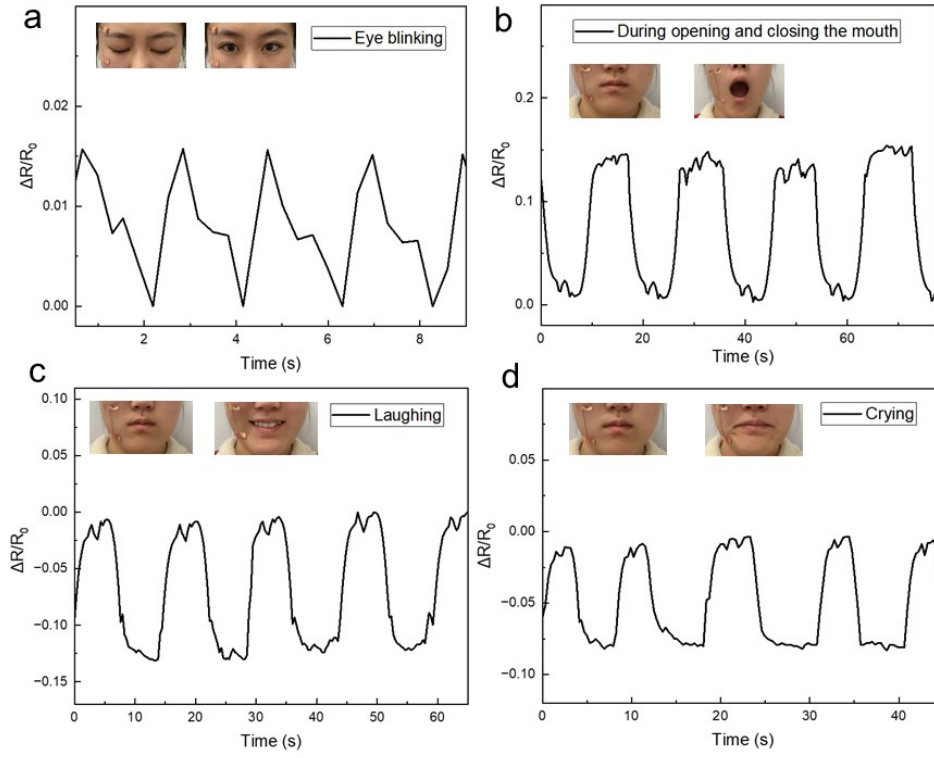

Fig. S10 (a) Sensors placed on the skin near the eyes during blinking change over time  $\Delta R/R_0$  response. Sensors attached to the skin near the mouth when opening-closing (b), laughing (c), and crying (d)  $\Delta R/R_0$  response.

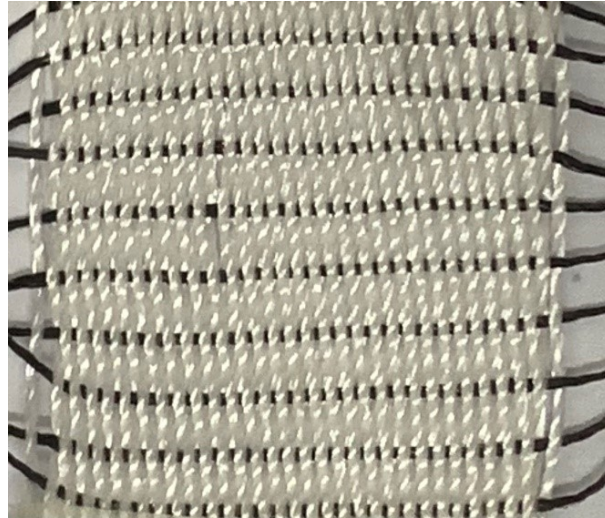

Fig. S11 Textile (strain sensor arrays) based on 150@GR/TPU fibrous yarns.

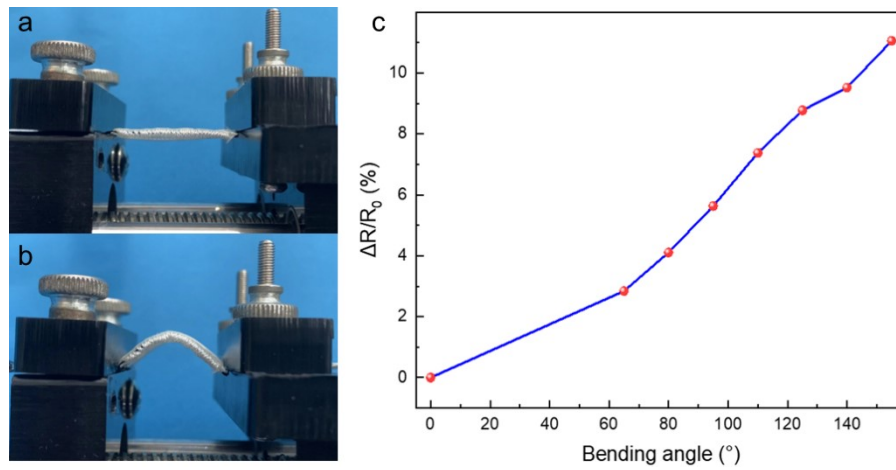

Fig. S12 Photographs of the side (a) and (b) side bends of the strain sensor. (b) Relative resistance change of strain sensors at different bending angles.

Table S1. Comparison of sensing capabilities between the current and other reported fabric-based sensors.

| Sample                                  | Strain | Cycling stability | Cost | Ref.      |
|-----------------------------------------|--------|-------------------|------|-----------|
| Ecoflex rubber/ carbonized natural yarn | 130%   | >100              | High | [18]      |
| AgNWs/ POE nanofiber composite yarn     | 63%    | >4500             | High | [35]      |
| Graphene fiber core/polymer shell       | 16%    | >200              | Low  | [52]      |
| GR/PVDF/PU                              | 10%    | >6000             | Low  | [51]      |
| GR/silk fabric                          | 10%    | >2500             | Low  | [40]      |
| GR/TPU yarn                             | 140%   | >10000            | Low  | This work |
